# Supplementary material for: Drivers of weight loss in a CDC-recognized digital diabetes prevention program
Source: PubMed Central journal article supplement — BMJ Open Diabetes Res Care. 2020 Jul 5;8(1):e001132. doi: 10.1136/bmjdrc-2019-001132 (PMC7337618; doi:10.1136/bmjdrc-2019-001132), 2020-07-05
Supplement: bmjdrc-2019-001132supp001.pdf [file bmjdrc-2019-001132supp001.pdf]

## Supplemental Tables and Figures

**Table S1. DPP Lesson Schedule and Topics**

| WEEK | TOPIC                                               |
|------|-----------------------------------------------------|
| 1    | Lesson 1: An Introduction to Diabetes Prevention    |
| 2    | Lesson 2: Tracking Your Food                        |
| 3    | Lesson 3: Getting Started with Healthy Eating       |
| 4    | Lesson 4: Track Your Activity                       |
| 5    | Lesson 5: Getting Started with Physical Activity    |
| 6    | Lesson 6: Finding Your Calorie Balance              |
| 7    | Lesson 7: Managing Stress                           |
| 8    | Lesson 8: Preparing Delicious, Healthy Meals        |
| 9    | Lesson 9: Getting More Active                       |
| 11   | Lesson 10: Getting Support                          |
| 13   | Lesson 11: Finding Time for Fitness                 |
| 15   | Lesson 12: Eating Well Away From Home               |
| 17   | Lesson 13: Making Triggers Work for You             |
| 19   | Lesson 14: Taking Charge of your Thoughts           |
| 21   | Lesson 15: Keeping your Heart Healthy               |
| 23   | Lesson 16: Staying Motivated                        |
| 25   | Lesson 17: Take Active Breaks                       |
| 27   | Lesson 18: Making Fast, Tasty Meals                 |
| 29   | Lesson 19: Healthy Sleep Habits                     |
| 31   | Lesson 20: When Weight Loss Stalls                  |
| 33   | Lesson 21: Staying Active When Life Gets In The Way |
| 35   | Lesson 22: Staying Social While Staying On Track    |
| 37   | Lesson 23 - Finding Your Mindfulness                |
| 39   | Lesson 24 - Powering Up Your Meals                  |
| 41   | Lesson 25 - Working Out At Home                     |
| 43   | Lesson 26 - Setting Floor and Push Goals            |
| 45   | Lesson 27 - Relieving Stress, Now and Later         |

|    |                                           |
|----|-------------------------------------------|
| 47 | Lesson 28 - Strength Training for Success |
| 49 | Lesson 29 - The Grainy Truth              |
| 51 | Lesson 30 - Celebrate Your Wins           |
| 52 | Lesson 31 - Preventing Diabetes For Life  |

Figure S1. Mean Weight Loss in Percent and Pounds by Engagement at 12 months.

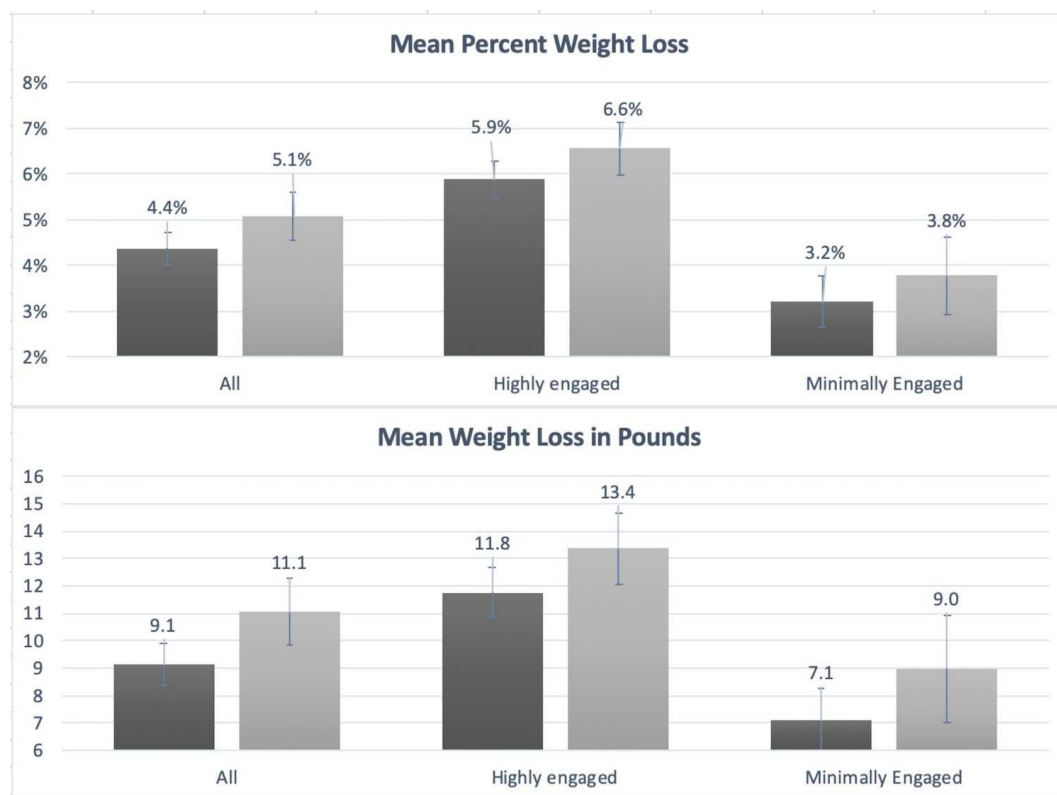

Statistical significance tests were conducted between engagement and weight-loss categories. T-tests were used for engagement group comparisons of continuous variables, Jonckheere-Terpstra were used for tests of trends for weight-loss categories, and Chi-square test for group comparisons of discrete variables.

**Table S2. Program Participation at 6-months by Engagement and Weight-Loss Category summarized using mean and standard deviation (SD) and percentages**

| <b>Self-monitoring</b>                               | All Participants <sup>a</sup> | Highly Engaged <sup>b</sup> | Minimally Engaged <sup>c</sup> | P-value | WL <5%            | WL 5- <7%         | WL 7- <10%        | WL ≥10%           | P-value |
|------------------------------------------------------|-------------------------------|-----------------------------|--------------------------------|---------|-------------------|-------------------|-------------------|-------------------|---------|
| N                                                    | 1355 (100%)                   | 640 (47%)                   | 715 (53%)                      |         | 771 (57%)         | 161 (12%)         | 163 (12%)         | 260 (19%)         |         |
| Weigh-ins / Week                                     | 4.38 (1.72)                   | 5.08 (1.58)                 | 3.83 (1.62)                    | <0.001  | 4.09 (1.68)       | 4.60 (1.66)       | 5.00 (1.60)       | 4.95 (1.73)       | <0.001  |
| 4 or more Weigh-ins / Week(%)                        | 64.51% (31.56%)               | 75.80% (29.23%)             | 55.72% (30.50%)                | <0.001  | 59.76% (31.44%)   | 69.14% (30.62%)   | 74.31% (29.55%)   | 73.38% (30.30%)   | <0.001  |
| Food Logs / Week                                     | 17.17 (11.06)                 | 24.35 (9.81)                | 11.54 (8.41)                   | <0.001  | 14.35 (9.76)      | 18.22 (11.29)     | 22.93 (10.69)     | 24.03 (11.77)     | <0.001  |
| Food Log Days / Week                                 | 4.21 (2.17)                   | 5.71 (1.56)                 | 3.04 (1.83)                    | <0.001  | 3.71 (2.10)       | 4.47 (2.05)       | 5.27 (1.88)       | 5.31 (2.07)       | <0.001  |
| Weeks with 5 or more Food Logs (%)                   | 68.22% (31.28%)               | 88.61% (20.41%)             | 52.23% (28.94%)                | <0.001  | 61.76% (31.41%)   | 72.21% (29.00%)   | 82.41% (25.71%)   | 81.44% (28.35%)   | <0.001  |
| Weeks with 15 or more Food Logs (%)                  | 55.08% (34.16%)               | 77.94% (27.10%)             | 37.15% (27.85%)                | <0.001  | 46.81% (32.42%)   | 58.00% (33.49%)   | 73.26% (30.02%)   | 74.00% (32.05%)   | <0.001  |
| Tracker Days / Week                                  | 4.35 (2.46)                   | 5.24 (2.03)                 | 3.66 (2.55)                    | <0.001  | 4.07 (2.56)       | 4.58 (2.34)       | 4.92 (2.16)       | 4.92 (2.14)       | <0.001  |
| Steps / Day                                          | 5654.31 (3653.56)             | 6737.55 (3852.36)           | 4693.85 (3174.77)              | <0.001  | 5015.40 (3275.91) | 5845.22 (3797.64) | 6489.30 (3542.78) | 7528.71 (4374.38) | <0.001  |
| Active Minutes/ Week (highly+fairly)                 | 217.34 (229.22)               | 298.27 (265.00)             | 152.18 (169.81)                | <0.001  | 177.96 (209.86)   | 208.89 (209.16)   | 273.43 (223.47)   | 358.06 (273.79)   | <0.001  |
| % of weeks with 150 mins more (highly+fairly active) | 43.43% (34.99%)               | 58.84% (33.64%)             | 31.44% (31.13%)                | <0.001  | 35.95% (32.51%)   | 45.60% (34.40%)   | 58.24% (35.13%)   | 63.00% (34.75%)   | <0.001  |
| Highly Active Minutes / Week                         | 159.26 (176.76)               | 225.58 (207.66)             | 105.79 (123.69)                | <0.001  | 126.53 (160.87)   | 156.09 (156.79)   | 204.63 (174.10)   | 273.65 (211.19)   | <0.001  |
| Fairly Active Minutes / Week                         | 75.94 (87.76)                 | 88.68 (102.16)              | 64.31 (70.25)                  | <0.001  | 68.76 (90.43)     | 68.72 (71.39)     | 82.56 (72.87)     | 109.02 (96.41)    | <0.001  |
| Lightly Active Minutes / Week                        | 1081.36 (536.03)              | 1172.69 (512.89)            | 998.14 (543.49)                | <0.001  | 1021.01 (530.13)  | 1230.76 (606.59)  | 1144.11 (511.47)  | 1153.16 (476.63)  | <0.001  |
| <b>Coach-Participant Interactions</b>                | All Participants <sup>a</sup> | Highly Engaged <sup>b</sup> | Minimally Engaged <sup>c</sup> | P-value | WL <5%            | WL 5- <7%         | WL 7- <10%        | WL ≥10%           | P-value |
| Lesson Attendance                                    | 16.76 (9.00)                  | 25.49 (4.39)                | 9.97 (4.86)                    | <0.001  | 15.04 (8.70)      | 17.44 (8.51)      | 20.31 (8.48)      | 20.91 (8.99)      | <0.001  |
| Coaching Session Attendance                          | 1.32 (0.47)                   | 1.46 (0.50)                 | 1.18 (0.39)                    | <0.001  | 1.27 (0.44)       | 1.35 (0.48)       | 1.42 (0.50)       | 1.42 (0.50)       | <0.001  |
| Having Initial Session before Week 5 (%)             | 36.14%                        | 36.67%                      | 35.73%                         | <0.001  | 35.54%            | 37.78%            | 35.94%            | 37.77%            | 0.777   |
| Number of Food Log Feedbacks /                       | 1.74 (1.25)                   | 2.06 (1.28)                 | 1.50 (1.16)                    | <0.001  | 1.63 (1.23)       | 1.82 (1.22)       | 2.07 (1.31)       | 1.89 (1.20)       | <0.001  |

|                                                 |                |                |                |        |                |                |                |                |        |
|-------------------------------------------------|----------------|----------------|----------------|--------|----------------|----------------|----------------|----------------|--------|
| Week                                            |                |                |                |        |                |                |                |                |        |
| Number of Food Log Feedback Days / Week         | 0.92<br>(0.48) | 1.05<br>(0.48) | 0.82<br>(0.45) | <0.001 | 0.87<br>(0.48) | 0.99<br>(0.49) | 1.06<br>(0.46) | 0.95<br>(0.44) | <0.001 |
| Number of Exercise Feedbacks / Week             | 0.51<br>(0.43) | 0.59<br>(0.44) | 0.46<br>(0.41) | <0.001 | 0.49<br>(0.43) | 0.52<br>(0.42) | 0.60<br>(0.44) | 0.50<br>(0.42) | 0.009  |
| Number of Exercise Feedback Days / Week         | 0.36<br>(0.27) | 0.40<br>(0.28) | 0.33<br>(0.27) | <0.001 | 0.35<br>(0.27) | 0.38<br>(0.28) | 0.40<br>(0.27) | 0.34<br>(0.26) | 0.063  |
| Number of Coach Message / Week                  | 3.63<br>(1.91) | 4.16<br>(1.87) | 3.22<br>(1.83) | <0.001 | 3.43<br>(1.86) | 3.75<br>(1.82) | 4.21<br>(1.97) | 3.89<br>(2.00) | <0.001 |
| Number of Coach Message Days / Week             | 1.84<br>(0.65) | 2.03<br>(0.60) | 1.70<br>(0.65) | <0.001 | 1.77<br>(0.64) | 1.94<br>(0.64) | 2.06<br>(0.62) | 1.90<br>(0.66) | <0.001 |
| Number of Participant Messages / Week           | 1.93<br>(1.63) | 2.40<br>(1.98) | 1.56<br>(1.17) | <0.001 | 1.79<br>(1.55) | 1.92<br>(1.35) | 2.36<br>(1.78) | 2.17<br>(1.96) | <0.001 |
| Number of Participant Message Days / Week       | 1.16<br>(0.72) | 1.37<br>(0.82) | 1.00<br>(0.59) | <0.001 | 1.10<br>(0.70) | 1.19<br>(0.65) | 1.36<br>(0.78) | 1.26<br>(0.76) | <0.001 |
| Number of Participant Community Messages / Week | 0.10<br>(0.15) | 0.12<br>(0.19) | 0.07<br>(0.11) | <0.001 | 0.08<br>(0.13) | 0.10<br>(0.15) | 0.14<br>(0.23) | 0.13<br>(0.16) | <0.001 |

- a. *All Participants*: Any participant enrolled in Livongo DPP who attended lesson one and provided a start weight.
- b. *Highly Engaged Participants*: Participants who met the CDC high-engagement criteria by completing nine lessons within months 1-6 of the program and three lessons within months 7-12 of the program with a minimum of 9-months between first and final lesson completed.[7]
- c. *Minimally Engaged Participants*: All participants not meeting the CDC high-engagement criteria.[7]
- d. Standard deviations in parentheses.

**Table S3. Participant Weighing, Food Logging, and Activity Frequency at 12-months by Engagement and Weight Loss Category using mean and standard deviation (SD)**

| Self-monitoring                                        | All Participants <sup>a</sup><br>N=1355 | Highly Engaged <sup>b</sup><br>N=640 | Minimally Engaged <sup>c</sup><br>N=715 | P-value | WL <5%<br>N=771 | WL 5- <7%<br>N=161 | WL 7- <10%<br>N=163 | WL ≥10%<br>N=260 | P-value |
|--------------------------------------------------------|-----------------------------------------|--------------------------------------|-----------------------------------------|---------|-----------------|--------------------|---------------------|------------------|---------|
| Weigh-ins / Week                                       | 3.9 (1.8)                               | 4.6 (1.8)                            | 3.2 (1.6)                               | <0.001  | 3.6 (1.7)       | 4.1 (1.8)          | 4.2 (2.0)           | 4.2 (2.0)        | <0.001  |
| 4 or more Weigh-ins / Week (%)                         | 55.3% (32.5%)                           | 67.8% (31.6%)                        | 44.2% (29.1%)                           | <0.001  | 51.8% (31.3%)   | 59.2% (31.8%)      | 60.5% (33.8%)       | 60.0% (34.6%)    | <0.001  |
| Food Logs / Week                                       | 12.6 (10.6)                             | 19.4 (10.6)                          | 6.4 (5.6)                               | <0.001  | 10.1 (8.8)      | 14.0 (10.6)        | 15.4 (11.2)         | 17.1 (12.5)      | <0.001  |
| Food Log Days / Week                                   | 3.1 (2.2)                               | 4.6 (1.9)                            | 1.7 (1.3)                               | <0.001  | 2.6 (2.0)       | 3.4 (2.1)          | 3.7 (2.3)           | 3.9 (2.4)        | <0.001  |
| Steps / Day                                            | 5332.6 (3783.8)                         | 6564.9 (3857.9)                      | 4045.6 (3240.8)                         | <0.001  | 4637.5 (3273.0) | 5633.2 (4197.9)    | 5775.8 (3695.2)     | 6844.4 (4386.9)  | <0.001  |
| Active Minutes/ Week (highly + fairly)                 | 197.4 (226.6)                           | 278.1 (258.5)                        | 122.2 (158.9)                           | <0.001  | 154.6 (192.8)   | 206.7 (227.6)      | 237.0 (217.3)       | 292.1 (283.8)    | <0.001  |
| % of weeks with 150 mins more (highly + fairly active) | 39.0% (34.8%)                           | 54.6% (34.3%)                        | 24.9% (28.8%)                           | <0.001  | 31.3% (31.1%)   | 43.5% (35.0%)      | 49.8% (36.0%)       | 51.9% (38.2%)    | <0.001  |
| Highly Active Minutes / Week                           | 138.2 (169.5)                           | 202.6 (199.0)                        | 78.1 (105.6)                            | <0.001  | 103.5 (138.5)   | 145.9 (174.3)      | 176.8 (170.2)       | 210.9 (214.7)    | <0.001  |
| Fairly Active Minutes / Week                           | 77.3 (90.9)                             | 90.9 (103.3)                         | 62.4 (72.3)                             | <0.001  | 69.1 (93.9)     | 71.6 (73.1)        | 77.2 (69.8)         | 104.6 (100.4)    | <0.001  |

- a. *All Participants*: Any participant enrolled in Livongo DPP who attended lesson one and provided a start weight.
- b. *Highly Engaged Participants*: Participants who met the CDC high-engagement criteria by completing nine lessons within months 1-6 of the program and three lessons within months 7-12 of the program with a minimum of nine months between first and final lesson completed.[7]
- c. *Minimally Engaged Participants*: All participants not meeting the CDC high-engagement criteria.[7]

**Table S4. Drivers of Weight Loss (lbs) Regression**

| Variables                                                                   | Coefficient | Standard Error | Standardized coefficient |
|-----------------------------------------------------------------------------|-------------|----------------|--------------------------|
| Total Lessons Attended                                                      | 0.144**     | 0.0705         | 0.0860                   |
| Start Weight                                                                | 0.0290*     | 0.0171         | 0.172                    |
| Male                                                                        | -0.608      | 0.860          | -0.0371                  |
| Age                                                                         | -0.0256     | 0.0276         | -0.0367                  |
| Education: College Graduate                                                 | -1.384*     | 0.722          | -0.0718                  |
| Start BMI                                                                   | -0.0539     | 0.114          | -0.0462                  |
| N of Coaching Sessions Attended                                             |             |                |                          |
| % of weeks with 4 or more Weigh-ins                                         | 0.206       | 0.986          | 0.00880                  |
| Average Number of Food Logs per Week                                        | 0.257**     | 0.110          | 0.366                    |
| Average Number of Food Logs per Week * Average Number of Food Logs per Week | -0.00181    | 0.00255        | -0.111                   |
| % of weeks with 150 minutes or more Activity                                | 0.0426***   | 0.00931        | 0.197                    |
| Coach Messages per Week                                                     | -0.0973     | 0.596          | -0.0177                  |
| Days per Week with Community Message                                        | 2.940       | 2.149          | 0.0543                   |
| Had a Coaching Session during 12-month Program                              | -0.241      | 0.766          | -0.0119                  |
| Coach Message per Week * Average Food Logs per Week                         | -0.0138     | 0.0232         | -0.0940                  |
| Constant                                                                    | -3.897      | 3.132          |                          |
| Observations                                                                | 638         |                | 638                      |
| R-squared                                                                   | 0.1533      |                | 0.153                    |

\*\*\* p<0.01, \*\* p<0.05, \* p<0.1
